# Supplementary material
Source: publisher figshare collection journal article supplement (https://acs.figshare.com/ndownloader/files/8523508)
Supplement: Supplementary file 1 [file 8523508]

Supporting Information

# Orientation control of two-dimensional perovskites by incorporating carboxylic acid moieties

*Ryosuke ARAI<sup>a</sup>, Masahiro YOSHIKAWA-FUJITA<sup>a</sup>, Yuko TAKEOKA<sup>a\*</sup> and Masahiro  
RIKUKAWA<sup>a</sup>*

<sup>a</sup> Faculty of Science and Engineering, Sophia University, 7-1 Kioi-cho, Chiyoda-ku, Tokyo, 102-8554, Japan.

## Elemental analysis data of compounds

Elemental analysis data for  $[\text{HOOC}(\text{CH}_2)_{n-1}\text{NH}_3\text{I}]_2\text{PbI}_4$  ( $n = 3$ ),  $\text{C}_6\text{H}_{16}\text{N}_2\text{PbI}_6$ ; Calc. C 8.05, H 1.80, N 3.13, I 56.72%, Exp. C 8.40, H 1.69, N 3.20, I 54.70%.

Elemental analysis data for  $[\text{HOOC}(\text{CH}_2)_{n-1}\text{NH}_3\text{I}]_2\text{PbI}_4$  ( $n = 4$ ),  $\text{C}_8\text{H}_{20}\text{N}_2\text{PbI}_6$ ; Calc. C 10.41, H 2.18, N 3.03, I 54.99%, Exp. C 10.46, H 1.62, N 2.99, I 55.69%.

Elemental analysis data for  $[\text{HOOC}(\text{CH}_2)_{n-1}\text{NH}_3\text{I}]_2\text{PbI}_4$  ( $n = 7$ ),  $\text{C}_{14}\text{H}_{32}\text{N}_2\text{PbI}_6$ ; Calc. C 16.69, H 3.20, N 2.78, I 50.40%, Exp. C 16.52, H 2.80, N 2.69, I 50.79%.

Elemental analysis data for  $[\text{CH}_3(\text{CH}_2)_{n-1}\text{NH}_3\text{I}]_2\text{PbI}_4$  ( $n = 3$ ),  $\text{C}_6\text{H}_{20}\text{N}_2\text{PbI}_6$ ; Calc. C 8.63, H 2.41, N 3.35, I 60.79%, Exp. C 7.99, H 1.71, N 3.04, I 59.74%.

Elemental analysis data for  $[\text{CH}_3(\text{CH}_2)_{n-1}\text{NH}_3\text{I}]_2\text{PbI}_4$  ( $n = 4$ ),  $\text{C}_8\text{H}_{24}\text{N}_2\text{PbI}_6$ ; Calc. C 11.13, H 2.80, N 3.25, I 58.81%, Exp. C 10.80, H 2.58, N 3.11, I 57.78%.

Elemental analysis data for  $[\text{CH}_3(\text{CH}_2)_{n-1}\text{NH}_3\text{I}]_2\text{PbI}_4$  ( $n = 7$ ),  $\text{C}_{14}\text{H}_{36}\text{N}_2\text{PbI}_6$ ; Calc. C 17.75, H 3.83, N 2.96, I 53.59%, Exp. C 17.96, H 3.25, N 3.14, I 52.26%.

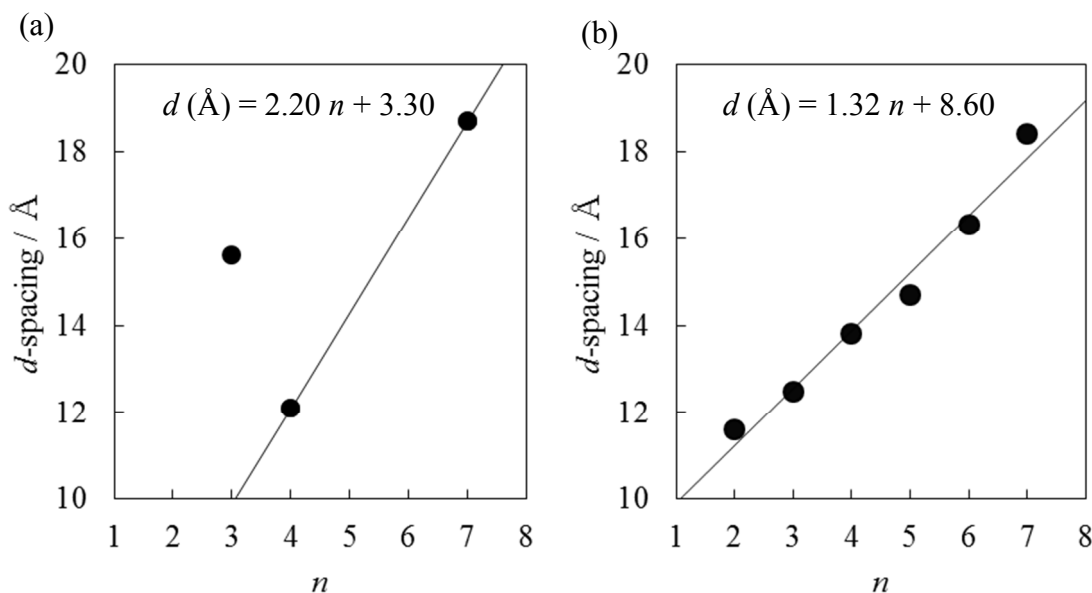

**Figure S1.**  $D$ -spacing values of (a)  $[\text{HOOC}(\text{CH}_2)_{n-1}\text{NH}_3\text{I}]_2\text{PbI}_4$  and (b)  $[\text{CH}_3(\text{CH}_2)_{n-1}\text{NH}_3]_2\text{PbI}_4$  films as a function of carbon atoms in organic amines.

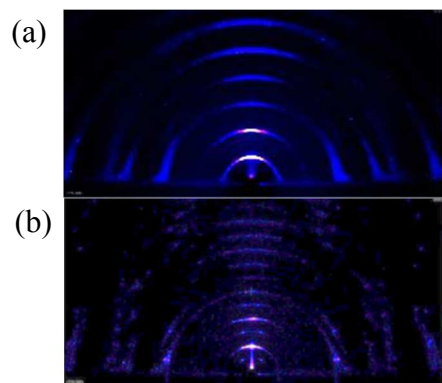

**Figure S2.** 2D WAXS images of (a)  $[\text{HOOC}(\text{CH}_2)_6\text{NH}_3]_2\text{PbI}_4$  and (b)  $[\text{CH}_3(\text{CH}_2)_6\text{NH}_3]_2\text{PbI}_4$  ( $n = 7$ ) films.
